# Supplementary material
Source: publisher figshare collection journal article supplement (https://diabetesjournals.figshare.com/ndownloader/files/27508094)
Supplement: Supplementary file 1 [file 27508094]

## Sheet: Info
Enrichment of islet annotations to overlap T2D GWAS or islet eQTL using fGWAS
annotation	Annotation name.
trait	trait name)
log2_fold	log2(fold enrichment)
log2_ci_lo	95% confidence interval for the log2(fold enrichment)
log2_ci_hi
Various islet annotations were tested such as CAGE TC, ATAC-seq peaks, chromatin states (generated using publicly available histone modification ChIP-seq data - supplementary methods and supplementary table 3) and other relevant islet annotations from Miguel-Escalada et al 2019, along with Coding and Conserved regions.

## Sheet: T2D_GWAS
annotation	trait	log2_fold	log2_ci_lo	log2_ci_hi
Coding	diamante.T2D_European	2.30157	1.65822	2.84916
Conserved	diamante.T2D_European	2.84228	2.3783	3.26232
TCs in accessible enhancers	diamante.T2D_European	7.33883	3.848	9.09753
TCs in accessible promoters	diamante.T2D_European	2.9707	-28.8539	4.40655
ATAC-seq peaks	diamante.T2D_European	2.70652	2.09498	3.21362
Accessible enhancers	diamante.T2D_European	3.22956	2.52985	3.7967
Accessible promoters	diamante.T2D_European	2.29655	1.01858	3.12204
TCs in enhancers	diamante.T2D_European	5.51029	-28.8539	7.40462
TCs in promoters	diamante.T2D_European	3.51803	1.06419	4.62957
TCs	diamante.T2D_European	3.62835	1.65181	4.65276
Weak TSS	diamante.T2D_European	0.146888	-2.41699	1.57363
Active enhancer	diamante.T2D_European	2.29935	1.79243	2.7608
Quiescent low signal	diamante.T2D_European	-1.94093	-2.36073	-1.53713
Active TSS	diamante.T2D_European	2.46502	1.68387	3.08406
Flanking TSS	diamante.T2D_European	3.01298	2.19926	3.64621
Repressed polycomb	diamante.T2D_European	-0.0650889	-1.40898	0.899906
Weak enhancer	diamante.T2D_European	1.26473	0.630557	1.79786
Genic enhancer	diamante.T2D_European	1.45191	-28.8539	3.93207
Weak transcription	diamante.T2D_European	0.756334	0.341616	1.15519
Strong transcription	diamante.T2D_European	2.42087	1.25347	3.24619
Active enhancers I	diamante.T2D_European	4.03129	3.42828	4.5586
Active enhancers II	diamante.T2D_European	2.32156	1.2796	3.09535
Active enhancers III	diamante.T2D_European	2.61621	1.00717	3.60434
Super enhancers	diamante.T2D_European	1.68272	0.93441	2.36583

## Sheet: islet_eqtl
annotation	trait	log2_fold	log2_ci_lo	log2_ci_hi
Coding	islet_inpsire_eqtl	4.17311	NA	4.32361
Conserved	islet_inpsire_eqtl	2.41764	2.18225	2.63673
TCs in accessible enhancers	islet_inpsire_eqtl	5.41575	1.01767	6.96441
TCs in accessible promoters	islet_inpsire_eqtl	5.81022	5.55772	6.04281
ATAC-seq peaks	islet_inpsire_eqtl	4.31963	NA	4.46368
Accessible enhancers	islet_inpsire_eqtl	2.93329	2.5739	3.25235
Accessible promoters	islet_inpsire_eqtl	4.90573	4.75228	NA
TCs in enhancers	islet_inpsire_eqtl	4.55632	2.29488	5.78724
TCs in promoters	islet_inpsire_eqtl	5.68625	5.44248	5.91483
TCs	islet_inpsire_eqtl	5.48337	5.23622	5.71395
Weak TSS	islet_inpsire_eqtl	0.177519	-0.401877	0.678323
Active enhancer	islet_inpsire_eqtl	1.45396	1.20249	1.68797
Quiescent low signal	islet_inpsire_eqtl	-3.05727	-3.26048	-2.8613
Active TSS	islet_inpsire_eqtl	4.59859	NA	NA
Flanking TSS	islet_inpsire_eqtl	3.85188	3.62988	4.06367
Repressed polycomb	islet_inpsire_eqtl	-3.00373	-4.22173	-2.16139
Weak enhancer	islet_inpsire_eqtl	1.43988	1.20649	1.65629
Genic enhancer	islet_inpsire_eqtl	3.39822	2.47816	4.07444
Weak transcription	islet_inpsire_eqtl	1.80618	1.66734	1.94778
Strong transcription	islet_inpsire_eqtl	3.38977	3.12535	3.63347
Active enhancers I	islet_inpsire_eqtl	2.74168	2.36572	3.07633
Active enhancers II	islet_inpsire_eqtl	2.39792	1.99522	2.75152
Active enhancers III	islet_inpsire_eqtl	2.14151	1.30842	2.7693
Super enhancers	islet_inpsire_eqtl	-0.0338132	-0.477411	0.364242
